# Supplementary material for: Silencing mutant SOD1 using RNAi protects against neurodegeneration and extends survival in an ALS model
Source: Springer Nature journal article supplement (doi:10.1038/nm1205), 2005-03-13

Supplementary Figure 1: Analysis of transgene copy number in EIAV-injected *SOD1<sup>G93A</sup>* mice used for this study. Genomic levels of the *SOD1<sup>G93A</sup>* transgene in mice injected with EIAV-SOD1HP1 or EIAV-Emp were investigated using Q-RT-PCR analysis of mouse genomic DNA. Copy number was estimated by comparing levels of transgene with standards from human genomic DNA containing known copies of the h*SOD1* gene. No significant difference in copy number was observed between groups,  $n=4$ .

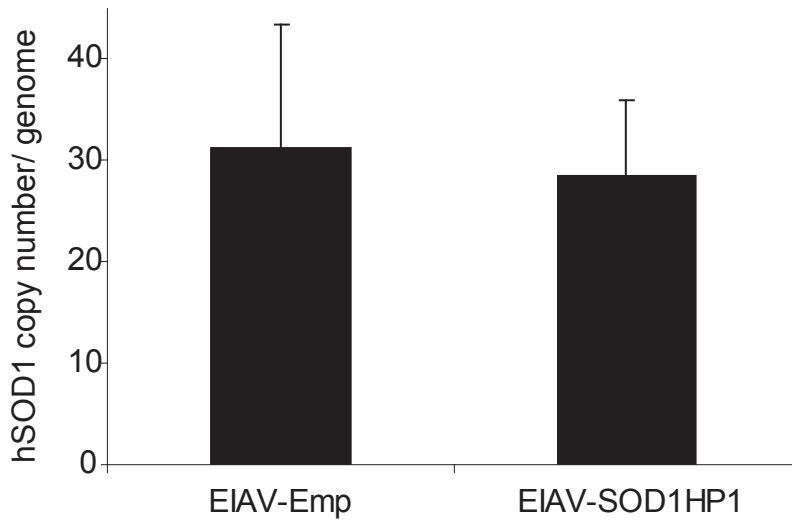

Supplement: nm1205-S1.pdf [file nm1205-S1.pdf]
